# Supplementary material
Source: PubMed Central journal article supplement (PMC5818063)
Supplement: joces-131-207985-s1.pdf [file joces-131-207985-s1.pdf]

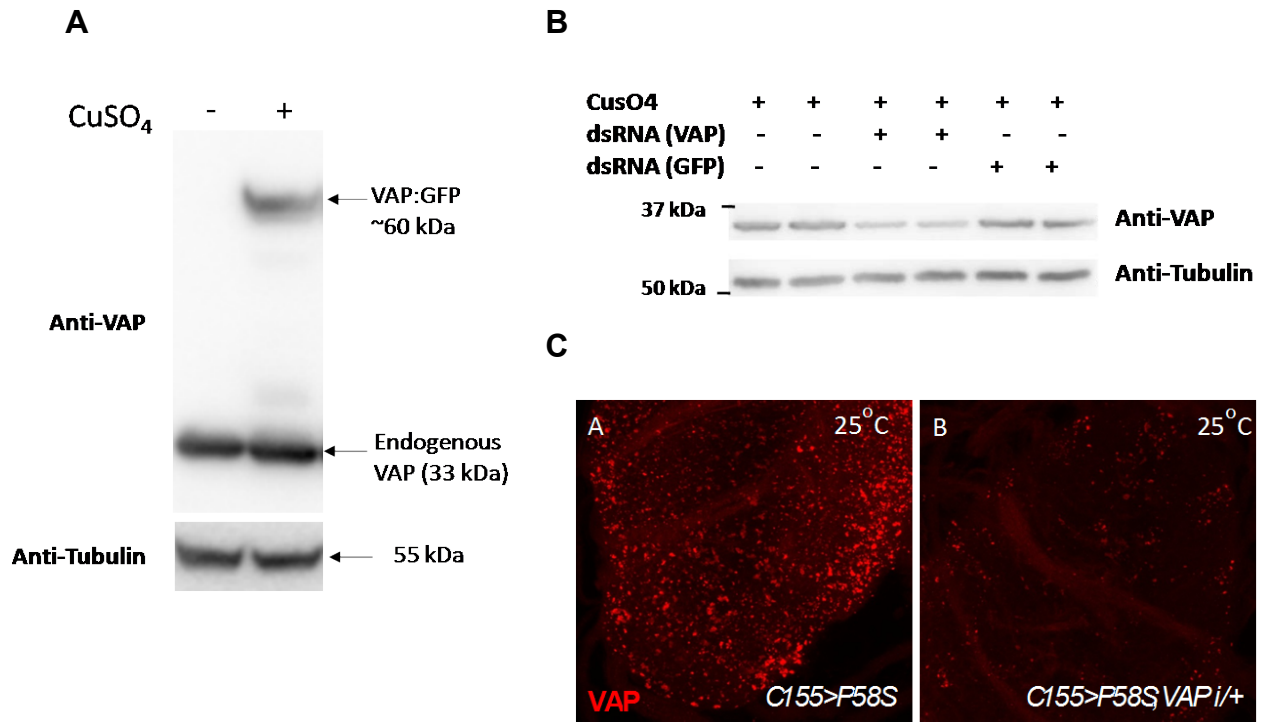

Supplementary Figure S1

### **A) Supplementary figure S1: Validation of dVAP-A antibody**

A) S2R<sup>+</sup> stable cell line expressing VAP:GFP. On induction (+) by 0.5 mM CuSO<sub>4</sub>, the VAP:GFP fusion can be seen at 60 kD. The antibody also cross-reacts with endogenous VAP (33 kDa). Antibody dilutions used are Anti-VAP (1:20,000), Anti-Tubulin (1:20,000).

B) Reduction of VAP-A transcripts by dsRNA leads to a decrease of VAP protein. 20 ug/ml dsRNA was added to S2R<sup>+</sup> cells, 48 hours before VAP induction. This led to a 50% decrease in VAP levels (lane 3 & 4).

C) VAP-A(P58S), when expressed in larval brain shows inclusions/protein aggregates in neurons, when stained with anti-dVAP antibody. These inclusions are not seen when VAP-A(wt) is overexpressed (data not shown). These aggregates can be reduced by reducing protein levels by VAP specific RNAi. Antibody dilution used is 1:1000 (Anti-dVAP-A)
